# Supplementary material for: On the distinct binding modes of expansin and carbohydrate-binding module proteins on crystalline and nanofibrous cellulose: implications for cellulose degradation by designer cellulosomes
Source: Royal Society of Chemistry journal article supplement (doi:10.1039/c7cp07764e), 2018-01-01
Supplement: c7cp07764e1.pdf [file c7cp07764e1.pdf]

You can find the movies in .avi format at the link below:

<https://www.dropbox.com/s/n61or2cfie3e2sc/movies.zip?dl=0>
